# Supplementary material for: A Metazoan/Plant-like Capping Enzyme and Cap Modified Nucleotides in the Unicellular Eukaryote Trichomonas vaginalis
Source: PubMed Central journal article supplement (PMC2904801; doi:10.1371/journal.ppat.1000999), 2010-07-15

**A**

PhyML ln(L)=-12182.1 223 sites LG 100 replic. 4 rate classes

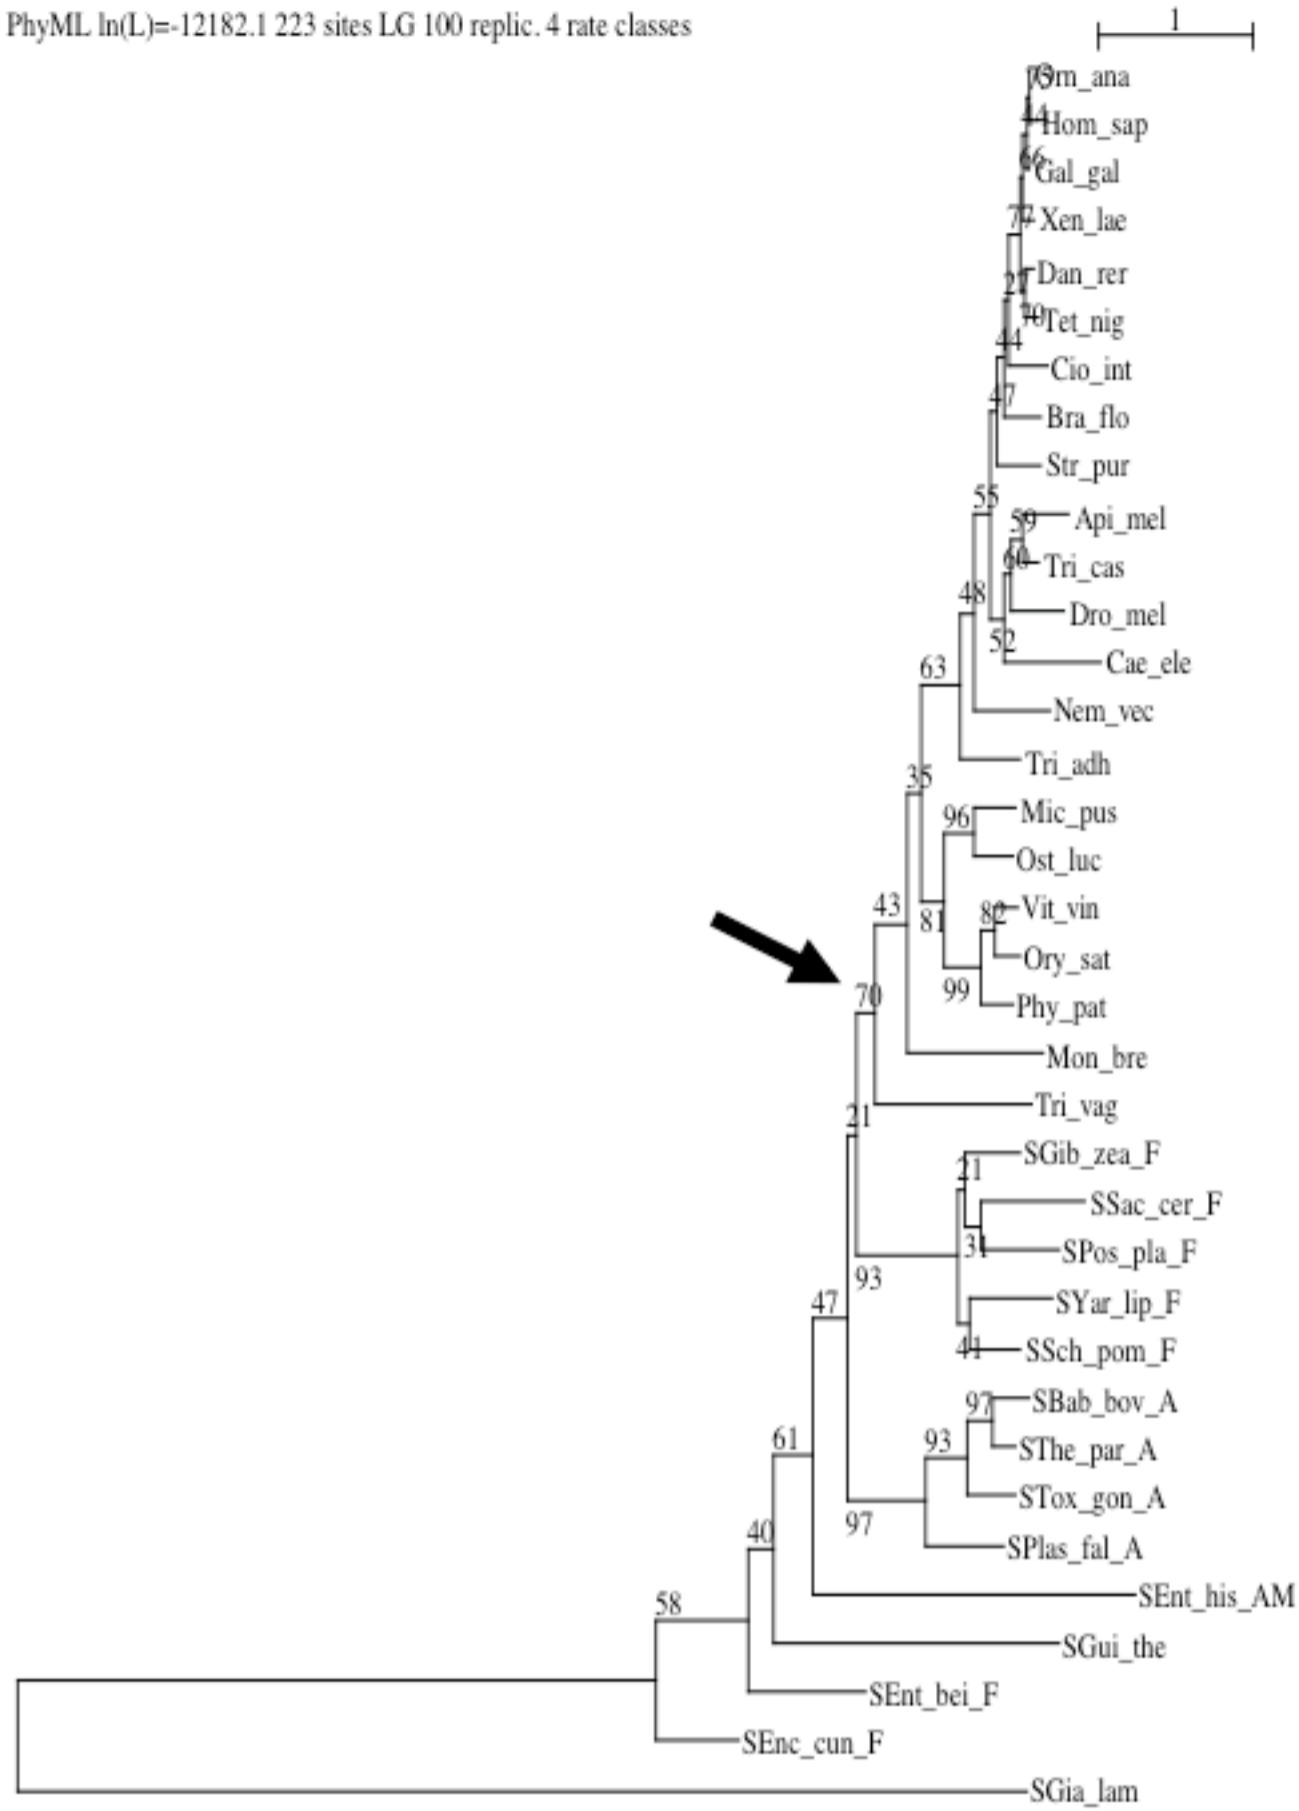**B**

PhyML ln(L)=-12029.1 223 sites LG 100 replic. 4 rate classes

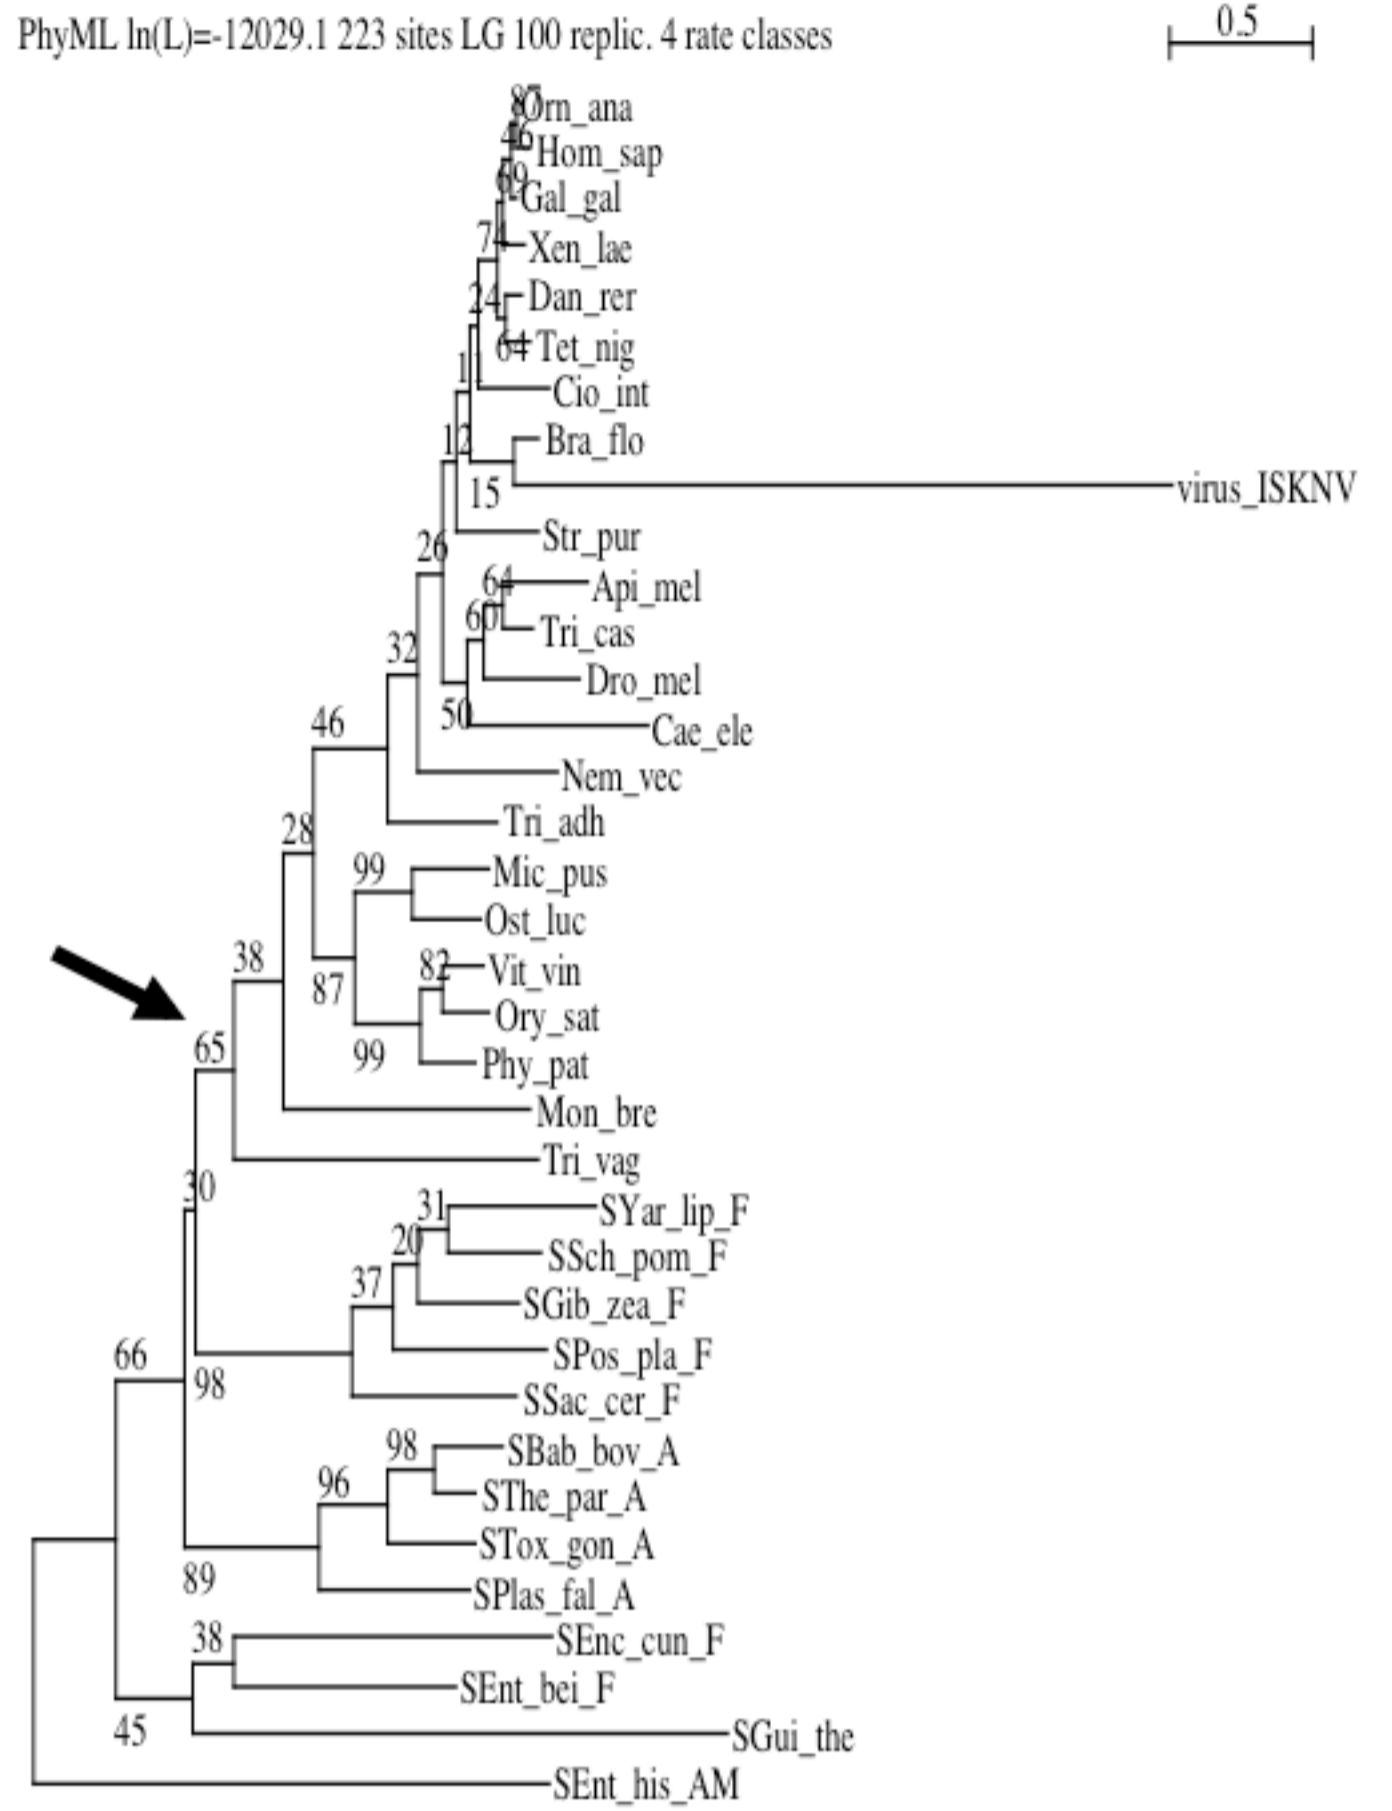**C**

PhyML ln(L)=-11564.0 223 sites LG 100 replic. 4 rate classes

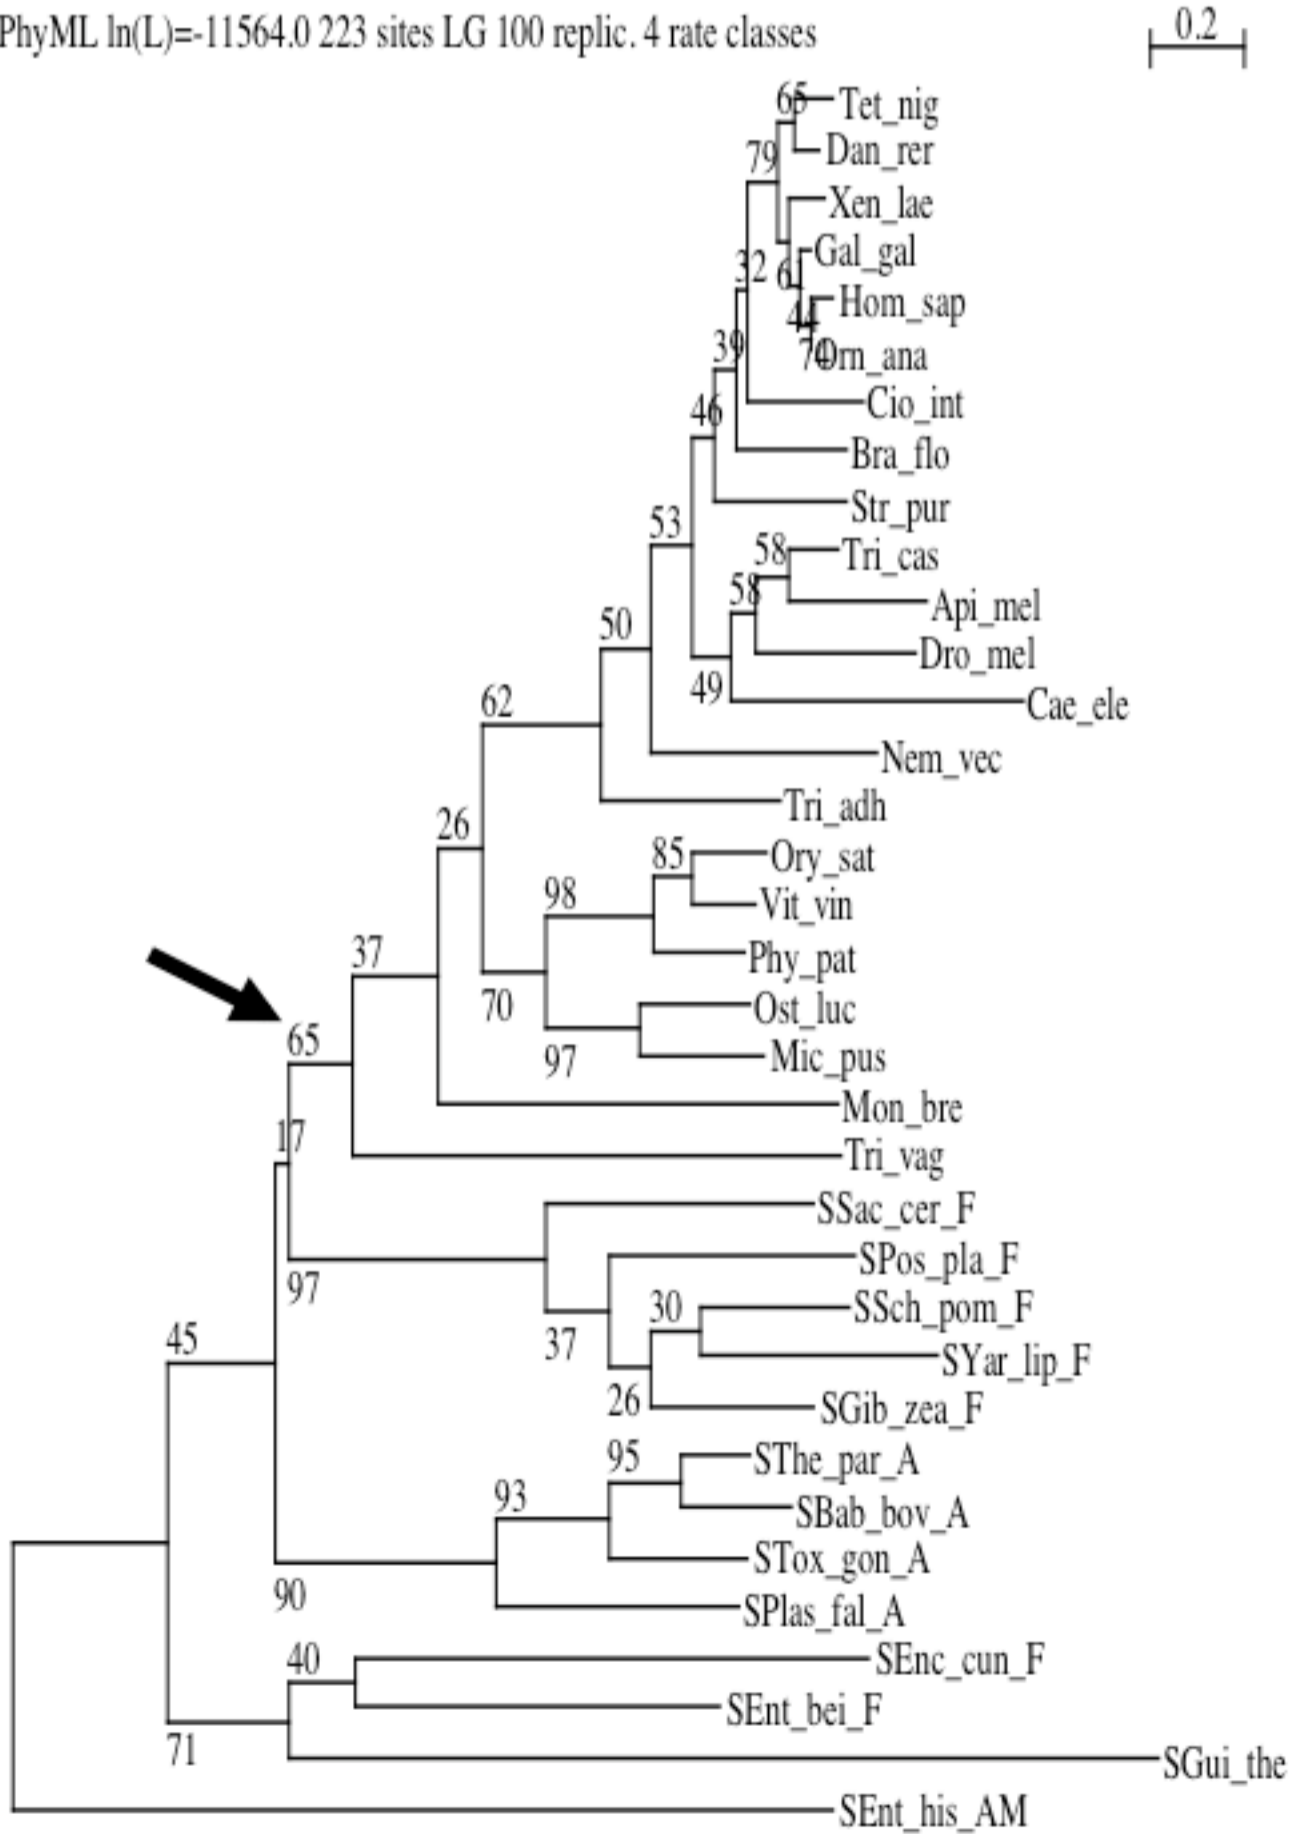**D**

PhyML ln(L)=-12040.3 410 sites LG 100 replic. 4 rate classes

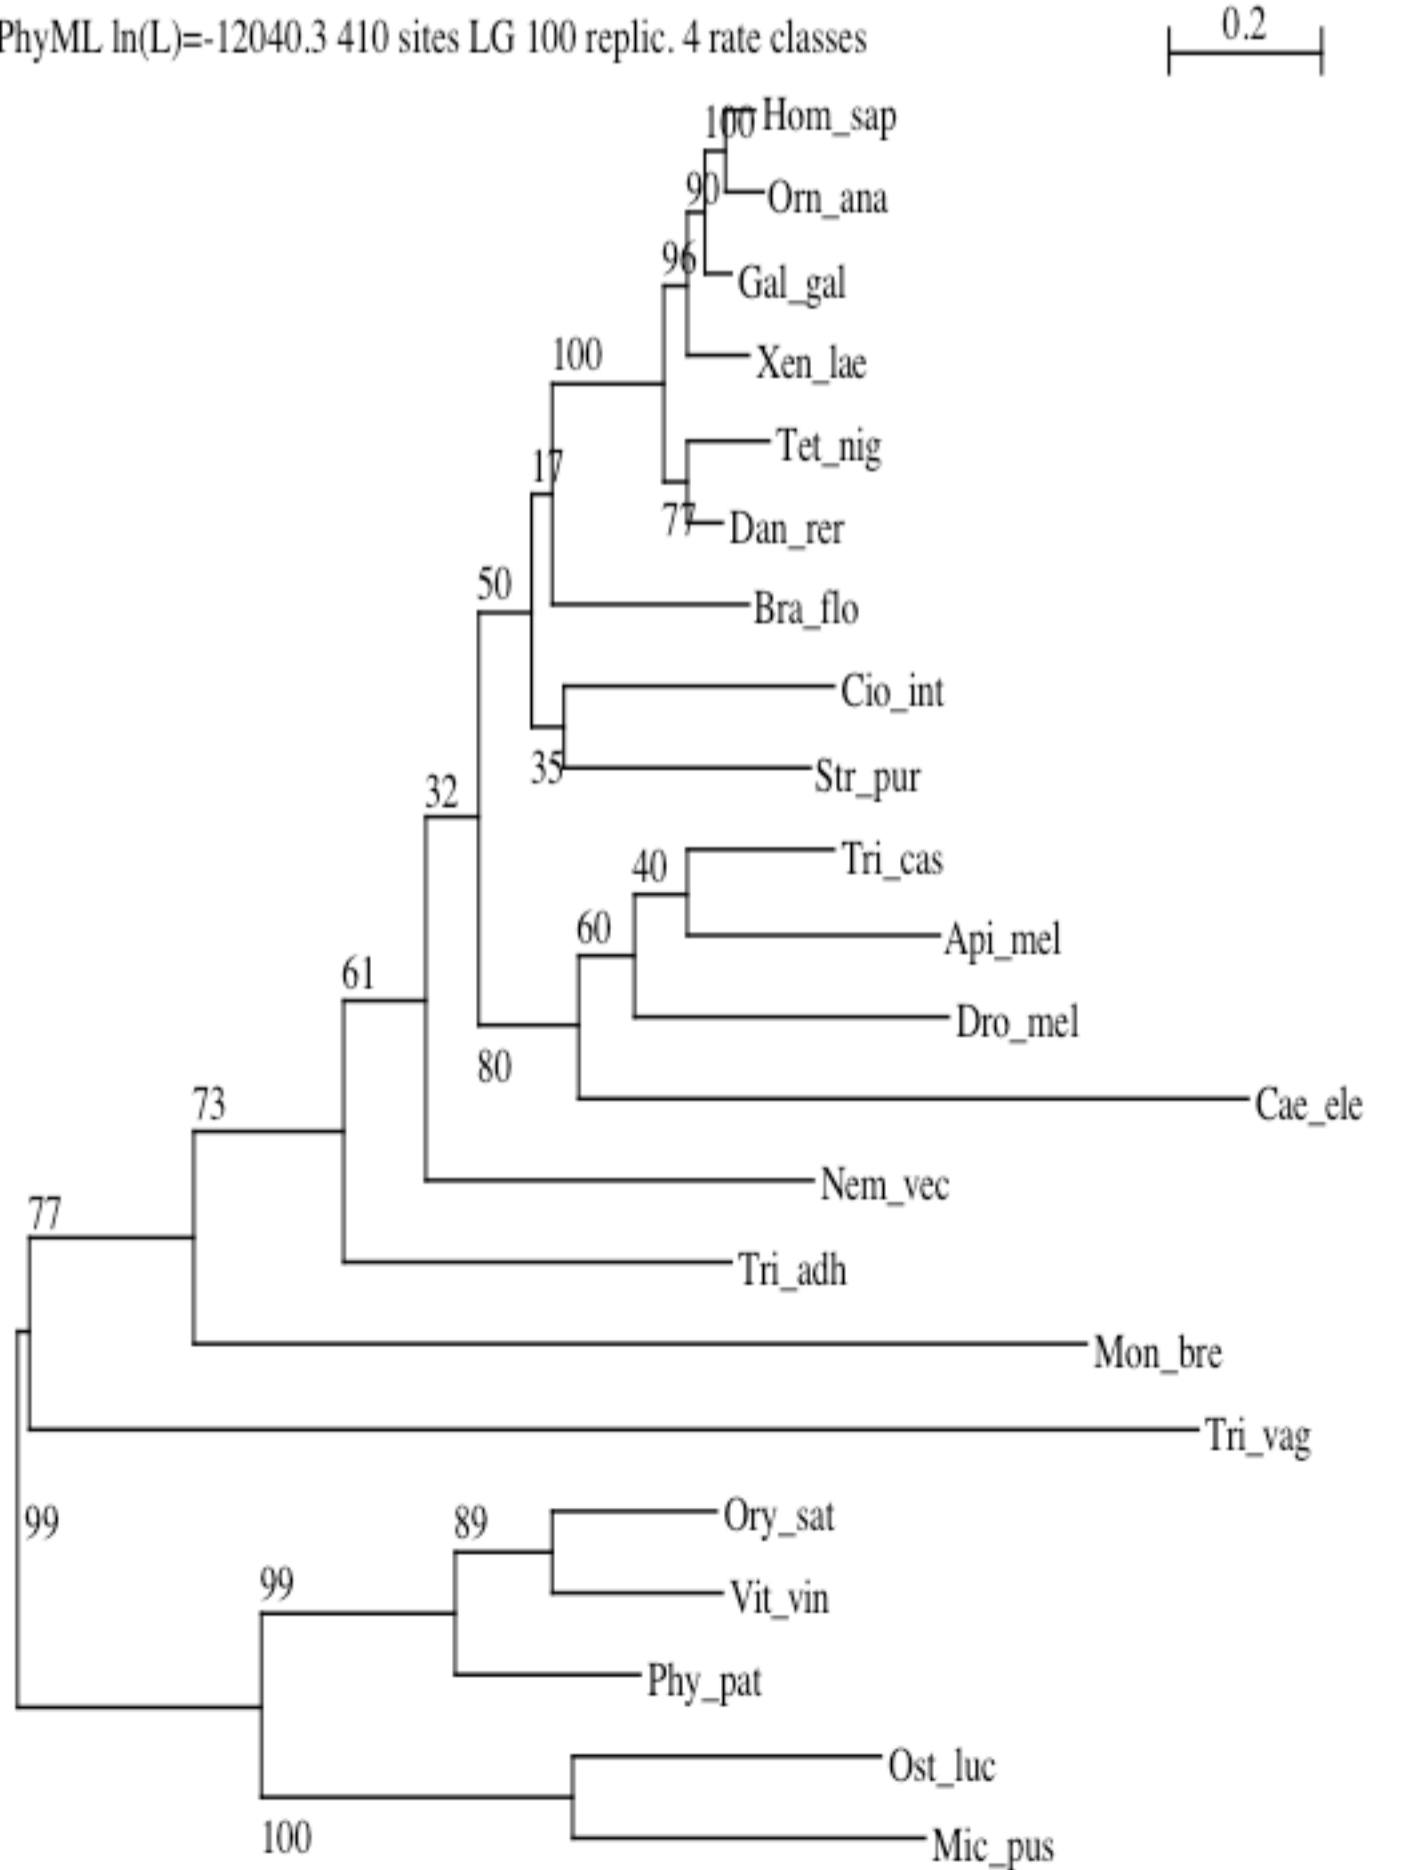

Supplement: ppat.1000999.s005.pdf [file ppat.1000999.s005.pdf]
