# Supplementary material for: A Metazoan/Plant-like Capping Enzyme and Cap Modified Nucleotides in the Unicellular Eukaryote Trichomonas vaginalis
Source: PLoS Pathog. 2010 Jul 15;6(7):e1000999. doi: 10.1371/journal.ppat.1000999 (PMC2904801; doi:10.1371/journal.ppat.1000999)
Supplement: Table S1 — Full names of species used in phylogenetic analyses and accession numbers for all gene sequences used in the work described here. (0.05 MB DOC) [file ppat.1000999.s006.doc]

**Supplementary Table 1.** Full names of species used in phylogenetic analyses and accession numbers for all gene sequences used in the work described here.

| Species Accession number |
| --- |
| **1. TPasePL-GTase** |
| *Apis mellifera*1 XP_397436.3 |
| *Branchiostoma floridae*1 XP_002225005.1 |
| *Caenorhabditis elegans*1, 2 NP_001020980.1 |
| *Ciona intestinalis*1 XP_002130836.1 |
| *Danio rerio*1 NP_998032.1 |
| *Drosophila melanogaster*1,2 NP_572952.1 |
| *Gallus gallus*1 XP_419843.2 |
| *Homo sapiens*1,2 NP_003791.3 |
| *Micromonas pusilla*1 EEH55839.1 |
| *Monosiga brevicollis*1 XP_001749658.1 |
| *Mus musculus*2  NP_036014.1 |
| *Nematostella vectensis*1 XP_001632157.1 |
| *Ornithorhynchus anatinus*1 XP_001513473.1 |
| *Oryza sativa*1,2 NP_001066345.1 |
| *Ostreococcus lucimarinus*1 XP_001416488.1 |
| *Physcomitrella patens*1 XP_001754697.1 |
| *Strongylocentrotus purpuratus*1 XP_782740.1 |
| *Tetraodon nigroviridis*1 CAG09212.1 |
| *Trichomonas vaginalis*1,2 XP_001327945.1  TrichDB accession1,2 TVAG_187730 |
| *Trichoplax adhaerens*1 XP_002114529.1 |
| *Tribolium castaneum*1 XP_972171.1 |
| Virus - Infectious spleen  and kidney necrosis virus1 NP_612286.1 |
| *Vitis vinifera*1 XP_002277969.1 |
| *Xenopus laevis*1 NP_001084232.1 |
| **2. GTase (functional with TPaseMDP)** |
| *Babesia bovis*1 XP_001611740.1 |
| *Crithidia fasciculata*2 AAC27927  *Cyanidioschyzon merolae*1 CMA035C (KEGG database)  *Dictyostelium discoideum*1 XP_636333 |
| *Encephalitozoon cuniculi*1,2 XP_955593.1 |
| *Entamoeba histolytica* 1 XP_652201.2 |
| *Enterocytozoon bieneusi*1 XP_001827843.1 |
| *Giardia lamblia*1,2 XP_001710153.1 |
| *Gibberella zeae*1 XP_387127.1 |
| *Guillardia theta*1 XP_001713326.1 |
| *Plasmodium falciparum*1,2 XP_001348317.1 |
| *Postia placenta*1 XP_002472334.1 |
| *Saccharomyces cerevisiae*1,2 NP_011385.1 |
| *Schizosaccharomyces pombe*1 NP_595708.1 |
| *Theileria parva*1 XP_764918.1 |
| *Toxoplasma gondii*1 XP_002370325.1 |
| *Trypanosoma brucei*2XP_829514.1 |
| *Yarrowia lipolytica*1 XP_503479.1 |

1 – Genes used in the phylogenetic analyses shown in Fig. 8 or Fig. 9.

2 - Genes used in the alignments shown in Fig 1.
